# Supplementary material
Source: PubMed Central journal article supplement (PMC3003068)
Supplement: 1011998107_pnas.201011998SI.pdf [file 1011998107_pnas.201011998SI.pdf]

# Supporting Information

Bergthaler et al. 10.1073/pnas.1011998107

**Table S1. Comparison of the glycoprotein 260 and long-segment 1,079 position in widely used lymphocytic choriomeningitis virus strains**

| Gene and amino acid position* | GP <sub>260</sub> | L <sub>1079</sub> |
|-------------------------------|-------------------|-------------------|
| LCMV strain                   |                   |                   |
| Armstrong <sup>†</sup>        | F                 | K                 |
| Clone 13 <sup>‡</sup>         | L                 | Q                 |
| WE <sup>§</sup>               | L                 | K                 |
| Aggressive <sup>¶</sup>       | L                 | K                 |
| Docile <sup>  </sup>          | L                 | K                 |
| Pasteur <sup>**</sup>         | L                 | K                 |
| Traub <sup>††</sup>           | L                 | K                 |

GP, glycoprotein; L, long segment; LCMV, lymphocytic choriomeningitis virus.

\*Counted from the first amino acid of the respective ORF.

<sup>†</sup>GenBank AY847350 and AY847351.

<sup>‡</sup>GenBank DQ361065 and DQ361066.

<sup>§</sup>GenBank M22138 and AF004519.

<sup>¶</sup>GenBank EU480450 and EU480451.

<sup>||</sup>GenBank EU480452 and EU480453.

<sup>\*\*</sup>GenBank DQ868485 and DQ868486.

<sup>††</sup>GenBank DQ868487 and DQ868488.
